# Supplementary material
Source: publisher site journal article supplement (https://spandidos-publications.com/1639/downloadSupplementary)
Supplement: Supplementary file 1 [file downloadSupplementary]

## Sheet: Table S3. GO enrichment analysi
Table SIII. Gene ontology enrichment analysis of the co-expressed mRNA.
from	to	correlation coefficient r	p value
SCARF2	GLIS2	0.731061	0
TUBB6	GLIS2	0.639876	0
OLFML1	GLIS2	0.693649	0
PTRF	GLIS2	0.67005	0
GPR124	GLIS2	0.698294	0
C1R	GLIS2	0.709551	0
LTBP2	GLIS2	0.65475	0
DCN	GLIS2	0.687683	0
TMEM47	GLIS2	0.58714	0
TMEM204	GLIS2	0.631843	0
COL8A1	GLIS2	0.714045	0
KIRREL	GLIS2	0.675479	0
ANTXR1	GLIS2	0.65738	0
AEBP1	GLIS2	0.734028	0
EFEMP2	GLIS2	0.767077	0
MDFIC	GLIS2	0.560782	0
SYDE1	GLIS2	0.713672	0
SERPING1	GLIS2	0.634718	0
DPYSL3	GLIS2	0.641159	0
LRRC32	GLIS2	0.69718	0
CMTM3	GLIS2	0.660295	0
ELN	GLIS2	0.707689	0
GGT5	GLIS2	0.700903	0
TGFB1I1	GLIS2	0.697093	0
AXL	GLIS2	0.636169	0
RFTN1	GLIS2	0.647981	0
TIMP2	GLIS2	0.718411	0
SYT11	GLIS2	0.605246	0
FSTL1	GLIS2	0.694987	0
IGFBP7	GLIS2	0.649772	0
PDGFRB	GLIS2	0.646834	0
LUM	GLIS2	0.681032	0
BGN	GLIS2	0.67878	0
LBH	GLIS2	0.707066	0
FBXL7	GLIS2	0.649558	0
C1S	GLIS2	0.706216	0
MXRA8	GLIS2	0.723165	0
TUBB6	SCARF2	0.699088	0
OLFML1	SCARF2	0.802566	0
PTRF	SCARF2	0.827321	0
GPR124	SCARF2	0.802846	0
C1R	SCARF2	0.773319	0
LTBP2	SCARF2	0.742599	0
DCN	SCARF2	0.759253	0
TMEM47	SCARF2	0.703131	0
TMEM204	SCARF2	0.74264	0
COL8A1	SCARF2	0.840044	0
KIRREL	SCARF2	0.803351	0
ANTXR1	SCARF2	0.826759	0
AEBP1	SCARF2	0.8994	0
EFEMP2	SCARF2	0.884042	0
MDFIC	SCARF2	0.631067	0
SYDE1	SCARF2	0.843141	0
SERPING1	SCARF2	0.737368	0
DPYSL3	SCARF2	0.767618	0
LRRC32	SCARF2	0.806187	0
CMTM3	SCARF2	0.800141	0
ELN	SCARF2	0.756918	0
GGT5	SCARF2	0.790522	0
TGFB1I1	SCARF2	0.80086	0
AXL	SCARF2	0.718657	0
RFTN1	SCARF2	0.720949	0
TIMP2	SCARF2	0.804605	0
SYT11	SCARF2	0.644193	0
FSTL1	SCARF2	0.836487	0
IGFBP7	SCARF2	0.730486	0
PDGFRB	SCARF2	0.808574	0
LUM	SCARF2	0.821004	0
BGN	SCARF2	0.832456	0
LBH	SCARF2	0.731513	0
FBXL7	SCARF2	0.779875	0
C1S	SCARF2	0.742076	0
MXRA8	SCARF2	0.909875	0
OLFML1	TUBB6	0.654477	0
PTRF	TUBB6	0.790999	0
GPR124	TUBB6	0.651609	0
C1R	TUBB6	0.6998	0
LTBP2	TUBB6	0.610791	0
DCN	TUBB6	0.700095	0
TMEM47	TUBB6	0.711523	0
TMEM204	TUBB6	0.654369	0
COL8A1	TUBB6	0.70805	0
KIRREL	TUBB6	0.699454	0
ANTXR1	TUBB6	0.644627	0
AEBP1	TUBB6	0.690839	0
EFEMP2	TUBB6	0.717737	0
MDFIC	TUBB6	0.675819	0
SYDE1	TUBB6	0.740563	0
SERPING1	TUBB6	0.650065	0
DPYSL3	TUBB6	0.739016	0
LRRC32	TUBB6	0.676705	0
CMTM3	TUBB6	0.683748	0
ELN	TUBB6	0.63894	0
GGT5	TUBB6	0.686485	0
TGFB1I1	TUBB6	0.786533	0
AXL	TUBB6	0.683482	0
RFTN1	TUBB6	0.673179	0
TIMP2	TUBB6	0.684215	0
SYT11	TUBB6	0.673066	0
FSTL1	TUBB6	0.741241	0
IGFBP7	TUBB6	0.709721	0
PDGFRB	TUBB6	0.630516	0
LUM	TUBB6	0.67494	0
BGN	TUBB6	0.641491	0
LBH	TUBB6	0.731375	0
FBXL7	TUBB6	0.69034	0
C1S	TUBB6	0.706753	0
MXRA8	TUBB6	0.678309	0
PTRF	OLFML1	0.777738	0
GPR124	OLFML1	0.833734	0
C1R	OLFML1	0.836142	0
LTBP2	OLFML1	0.757005	0
DCN	OLFML1	0.878289	0
TMEM47	OLFML1	0.779914	0
TMEM204	OLFML1	0.762944	0
COL8A1	OLFML1	0.827341	0
KIRREL	OLFML1	0.795653	0
ANTXR1	OLFML1	0.793567	0
AEBP1	OLFML1	0.839323	0
EFEMP2	OLFML1	0.85553	0
MDFIC	OLFML1	0.788103	0
SYDE1	OLFML1	0.846568	0
SERPING1	OLFML1	0.810342	0
DPYSL3	OLFML1	0.771117	0
LRRC32	OLFML1	0.844856	0
CMTM3	OLFML1	0.799893	0
ELN	OLFML1	0.75501	0
GGT5	OLFML1	0.873624	0
TGFB1I1	OLFML1	0.771443	0
AXL	OLFML1	0.768579	0
RFTN1	OLFML1	0.840503	0
TIMP2	OLFML1	0.774372	0
SYT11	OLFML1	0.741265	0
FSTL1	OLFML1	0.863158	0
IGFBP7	OLFML1	0.821495	0
PDGFRB	OLFML1	0.844391	0
LUM	OLFML1	0.859521	0
BGN	OLFML1	0.782165	0
LBH	OLFML1	0.707329	0
FBXL7	OLFML1	0.877271	0
C1S	OLFML1	0.831383	0
MXRA8	OLFML1	0.808176	0
GPR124	PTRF	0.815428	0
C1R	PTRF	0.762114	0
LTBP2	PTRF	0.706017	0
DCN	PTRF	0.806146	0
TMEM47	PTRF	0.80435	0
TMEM204	PTRF	0.772471	0
COL8A1	PTRF	0.837669	0
KIRREL	PTRF	0.795336	0
ANTXR1	PTRF	0.759355	0
AEBP1	PTRF	0.817548	0
EFEMP2	PTRF	0.809969	0
MDFIC	PTRF	0.732713	0
SYDE1	PTRF	0.866601	0
SERPING1	PTRF	0.716823	0
DPYSL3	PTRF	0.842285	0
LRRC32	PTRF	0.808671	0
CMTM3	PTRF	0.749206	0
ELN	PTRF	0.701919	0
GGT5	PTRF	0.809583	0
TGFB1I1	PTRF	0.866256	0
AXL	PTRF	0.798487	0
RFTN1	PTRF	0.767378	0
TIMP2	PTRF	0.785434	0
SYT11	PTRF	0.744931	0
FSTL1	PTRF	0.845555	0
IGFBP7	PTRF	0.79976	0
PDGFRB	PTRF	0.801167	0
LUM	PTRF	0.784346	0
BGN	PTRF	0.792328	0
LBH	PTRF	0.725969	0
FBXL7	PTRF	0.837069	0
C1S	PTRF	0.762034	0
MXRA8	PTRF	0.810272	0
C1R	GPR124	0.77301	0
LTBP2	GPR124	0.875779	0
DCN	GPR124	0.845656	0
TMEM47	GPR124	0.755424	0
TMEM204	GPR124	0.793448	0
COL8A1	GPR124	0.839095	0
KIRREL	GPR124	0.868542	0
ANTXR1	GPR124	0.826599	0
AEBP1	GPR124	0.865828	0
EFEMP2	GPR124	0.80412	0
MDFIC	GPR124	0.710782	0
SYDE1	GPR124	0.904524	0
SERPING1	GPR124	0.683185	0
DPYSL3	GPR124	0.715693	0
LRRC32	GPR124	0.905694	0
CMTM3	GPR124	0.740916	0
ELN	GPR124	0.760915	0
GGT5	GPR124	0.863759	0
TGFB1I1	GPR124	0.751652	0
AXL	GPR124	0.774144	0
RFTN1	GPR124	0.854079	0
TIMP2	GPR124	0.799143	0
SYT11	GPR124	0.716596	0
FSTL1	GPR124	0.871179	0
IGFBP7	GPR124	0.738878	0
PDGFRB	GPR124	0.929233	0
LUM	GPR124	0.806665	0
BGN	GPR124	0.793495	0
LBH	GPR124	0.704835	0
FBXL7	GPR124	0.865798	0
C1S	GPR124	0.775117	0
MXRA8	GPR124	0.77153	0
LTBP2	C1R	0.73784	0
DCN	C1R	0.816028	0
TMEM47	C1R	0.724699	0
TMEM204	C1R	0.751859	0
COL8A1	C1R	0.771212	0
KIRREL	C1R	0.723666	0
ANTXR1	C1R	0.723206	0
AEBP1	C1R	0.81755	0
EFEMP2	C1R	0.82686	0
MDFIC	C1R	0.749403	0
SYDE1	C1R	0.82828	0
SERPING1	C1R	0.905036	0
DPYSL3	C1R	0.753539	0
LRRC32	C1R	0.777873	0
CMTM3	C1R	0.757078	0
ELN	C1R	0.697375	0
GGT5	C1R	0.859526	0
TGFB1I1	C1R	0.785762	0
AXL	C1R	0.791438	0
RFTN1	C1R	0.847147	0
TIMP2	C1R	0.734757	0
SYT11	C1R	0.74825	0
FSTL1	C1R	0.793697	0
IGFBP7	C1R	0.776626	0
PDGFRB	C1R	0.754128	0
LUM	C1R	0.790058	0
BGN	C1R	0.720436	0
LBH	C1R	0.707813	0
FBXL7	C1R	0.786928	0
C1S	C1R	0.962461	0
MXRA8	C1R	0.757793	0
DCN	LTBP2	0.827441	0
TMEM47	LTBP2	0.71892	0
TMEM204	LTBP2	0.694634	0
COL8A1	LTBP2	0.797566	0
KIRREL	LTBP2	0.784805	0
ANTXR1	LTBP2	0.826469	0
AEBP1	LTBP2	0.835556	0
EFEMP2	LTBP2	0.708212	0
MDFIC	LTBP2	0.654634	0
SYDE1	LTBP2	0.802659	0
SERPING1	LTBP2	0.648597	0
DPYSL3	LTBP2	0.632935	0
LRRC32	LTBP2	0.823044	0
CMTM3	LTBP2	0.66144	0
ELN	LTBP2	0.78768	0
GGT5	LTBP2	0.787021	0
TGFB1I1	LTBP2	0.657386	0
AXL	LTBP2	0.695926	0
RFTN1	LTBP2	0.780427	0
TIMP2	LTBP2	0.77289	0
SYT11	LTBP2	0.678839	0
FSTL1	LTBP2	0.796036	0
IGFBP7	LTBP2	0.642583	0
PDGFRB	LTBP2	0.837589	0
LUM	LTBP2	0.772859	0
BGN	LTBP2	0.705998	0
LBH	LTBP2	0.72134	0
FBXL7	LTBP2	0.779865	0
C1S	LTBP2	0.745265	0
MXRA8	LTBP2	0.710495	0
TMEM47	DCN	0.84363	0
TMEM204	DCN	0.753065	0
COL8A1	DCN	0.873443	0
KIRREL	DCN	0.767375	0
ANTXR1	DCN	0.847868	0
AEBP1	DCN	0.870724	0
EFEMP2	DCN	0.815174	0
MDFIC	DCN	0.74805	0
SYDE1	DCN	0.866708	0
SERPING1	DCN	0.74814	0
DPYSL3	DCN	0.785139	0
LRRC32	DCN	0.825713	0
CMTM3	DCN	0.711636	0
ELN	DCN	0.768785	0
GGT5	DCN	0.883349	0
TGFB1I1	DCN	0.817889	0
AXL	DCN	0.743744	0
RFTN1	DCN	0.811062	0
TIMP2	DCN	0.824723	0
SYT11	DCN	0.734903	0
FSTL1	DCN	0.864955	0
IGFBP7	DCN	0.795515	0
PDGFRB	DCN	0.816585	0
LUM	DCN	0.913947	0
BGN	DCN	0.761649	0
LBH	DCN	0.703197	0
FBXL7	DCN	0.857658	0
C1S	DCN	0.825388	0
MXRA8	DCN	0.761178	0
TMEM204	TMEM47	0.723303	0
COL8A1	TMEM47	0.826492	0
KIRREL	TMEM47	0.729967	0
ANTXR1	TMEM47	0.780082	0
AEBP1	TMEM47	0.783133	0
EFEMP2	TMEM47	0.71808	0
MDFIC	TMEM47	0.802212	0
SYDE1	TMEM47	0.812759	0
SERPING1	TMEM47	0.691203	0
DPYSL3	TMEM47	0.837141	0
LRRC32	TMEM47	0.743201	0
CMTM3	TMEM47	0.649841	0
ELN	TMEM47	0.716754	0
GGT5	TMEM47	0.776302	0
TGFB1I1	TMEM47	0.826239	0
AXL	TMEM47	0.7213	0
RFTN1	TMEM47	0.779951	0
TIMP2	TMEM47	0.787545	0
SYT11	TMEM47	0.787542	0
FSTL1	TMEM47	0.815731	0
IGFBP7	TMEM47	0.763565	0
PDGFRB	TMEM47	0.732985	0
LUM	TMEM47	0.814331	0
BGN	TMEM47	0.66907	0
LBH	TMEM47	0.730341	0
FBXL7	TMEM47	0.857054	0
C1S	TMEM47	0.73496	0
MXRA8	TMEM47	0.672664	0
COL8A1	TMEM204	0.73035	0
KIRREL	TMEM204	0.715961	0
ANTXR1	TMEM204	0.667007	0
AEBP1	TMEM204	0.752324	0
EFEMP2	TMEM204	0.792191	0
MDFIC	TMEM204	0.673546	0
SYDE1	TMEM204	0.878262	0
SERPING1	TMEM204	0.668358	0
DPYSL3	TMEM204	0.692174	0
LRRC32	TMEM204	0.786642	0
CMTM3	TMEM204	0.746127	0
ELN	TMEM204	0.716704	0
GGT5	TMEM204	0.843527	0
TGFB1I1	TMEM204	0.79205	0
AXL	TMEM204	0.704332	0
RFTN1	TMEM204	0.826443	0
TIMP2	TMEM204	0.693242	0
SYT11	TMEM204	0.691357	0
FSTL1	TMEM204	0.758363	0
IGFBP7	TMEM204	0.880102	0
PDGFRB	TMEM204	0.770134	0
LUM	TMEM204	0.696226	0
BGN	TMEM204	0.752181	0
LBH	TMEM204	0.72658	0
FBXL7	TMEM204	0.792636	0
C1S	TMEM204	0.720519	0
MXRA8	TMEM204	0.715971	0
KIRREL	COL8A1	0.771669	0
ANTXR1	COL8A1	0.874233	0
AEBP1	COL8A1	0.884233	0
EFEMP2	COL8A1	0.817855	0
MDFIC	COL8A1	0.743037	0
SYDE1	COL8A1	0.860723	0
SERPING1	COL8A1	0.720115	0
DPYSL3	COL8A1	0.835434	0
LRRC32	COL8A1	0.860435	0
CMTM3	COL8A1	0.758293	0
ELN	COL8A1	0.803903	0
GGT5	COL8A1	0.849453	0
TGFB1I1	COL8A1	0.825675	0
AXL	COL8A1	0.781071	0
RFTN1	COL8A1	0.779223	0
TIMP2	COL8A1	0.840047	0
SYT11	COL8A1	0.74254	0
FSTL1	COL8A1	0.875196	0
IGFBP7	COL8A1	0.774762	0
PDGFRB	COL8A1	0.840425	0
LUM	COL8A1	0.894971	0
BGN	COL8A1	0.838942	0
LBH	COL8A1	0.709293	0
FBXL7	COL8A1	0.832003	0
C1S	COL8A1	0.768457	0
MXRA8	COL8A1	0.786301	0
ANTXR1	KIRREL	0.787319	0
AEBP1	KIRREL	0.776393	0
EFEMP2	KIRREL	0.767837	0
MDFIC	KIRREL	0.706564	0
SYDE1	KIRREL	0.836211	0
SERPING1	KIRREL	0.646269	0
DPYSL3	KIRREL	0.700806	0
LRRC32	KIRREL	0.815531	0
CMTM3	KIRREL	0.688837	0
ELN	KIRREL	0.708962	0
GGT5	KIRREL	0.754788	0
TGFB1I1	KIRREL	0.702921	0
AXL	KIRREL	0.730515	0
RFTN1	KIRREL	0.781602	0
TIMP2	KIRREL	0.767795	0
SYT11	KIRREL	0.691302	0
FSTL1	KIRREL	0.872906	0
IGFBP7	KIRREL	0.684362	0
PDGFRB	KIRREL	0.841085	0
LUM	KIRREL	0.752171	0
BGN	KIRREL	0.698034	0
LBH	KIRREL	0.739202	0
FBXL7	KIRREL	0.848727	0
C1S	KIRREL	0.74021	0
MXRA8	KIRREL	0.756371	0
AEBP1	ANTXR1	0.916866	0
EFEMP2	ANTXR1	0.77341	0
MDFIC	ANTXR1	0.689622	0
SYDE1	ANTXR1	0.847453	0
SERPING1	ANTXR1	0.706645	0
DPYSL3	ANTXR1	0.733316	0
LRRC32	ANTXR1	0.823499	0
CMTM3	ANTXR1	0.726841	0
ELN	ANTXR1	0.697804	0
GGT5	ANTXR1	0.782805	0
TGFB1I1	ANTXR1	0.749652	0
AXL	ANTXR1	0.753408	0
RFTN1	ANTXR1	0.717421	0
TIMP2	ANTXR1	0.877137	0
SYT11	ANTXR1	0.652512	0
FSTL1	ANTXR1	0.880737	0
IGFBP7	ANTXR1	0.687968	0
PDGFRB	ANTXR1	0.86746	0
LUM	ANTXR1	0.910325	0
BGN	ANTXR1	0.820665	0
LBH	ANTXR1	0.701185	0
FBXL7	ANTXR1	0.80975	0
C1S	ANTXR1	0.735267	0
MXRA8	ANTXR1	0.778527	0
EFEMP2	AEBP1	0.873164	0
MDFIC	AEBP1	0.687608	0
SYDE1	AEBP1	0.895207	0
SERPING1	AEBP1	0.79043	0
DPYSL3	AEBP1	0.762139	0
LRRC32	AEBP1	0.865876	0
CMTM3	AEBP1	0.792019	0
ELN	AEBP1	0.747602	0
GGT5	AEBP1	0.875039	0
TGFB1I1	AEBP1	0.814002	0
AXL	AEBP1	0.779068	0
RFTN1	AEBP1	0.786259	0
TIMP2	AEBP1	0.872818	0
SYT11	AEBP1	0.685569	0
FSTL1	AEBP1	0.869996	0
IGFBP7	AEBP1	0.756758	0
PDGFRB	AEBP1	0.880832	0
LUM	AEBP1	0.908193	0
BGN	AEBP1	0.89353	0
LBH	AEBP1	0.742323	0
FBXL7	AEBP1	0.818589	0
C1S	AEBP1	0.809885	0
MXRA8	AEBP1	0.855632	0
MDFIC	EFEMP2	0.686413	0
SYDE1	EFEMP2	0.880134	0
SERPING1	EFEMP2	0.801937	0
DPYSL3	EFEMP2	0.778974	0
LRRC32	EFEMP2	0.796242	0
CMTM3	EFEMP2	0.859652	0
ELN	EFEMP2	0.743857	0
GGT5	EFEMP2	0.846979	0
TGFB1I1	EFEMP2	0.855995	0
AXL	EFEMP2	0.774152	0
RFTN1	EFEMP2	0.785259	0
TIMP2	EFEMP2	0.78928	0
SYT11	EFEMP2	0.711316	0
FSTL1	EFEMP2	0.860175	0
IGFBP7	EFEMP2	0.825669	0
PDGFRB	EFEMP2	0.778579	0
LUM	EFEMP2	0.81673	0
BGN	EFEMP2	0.838472	0
LBH	EFEMP2	0.717416	0
FBXL7	EFEMP2	0.806731	0
C1S	EFEMP2	0.812507	0
MXRA8	EFEMP2	0.889573	0
SYDE1	MDFIC	0.729808	0
SERPING1	MDFIC	0.748135	0
DPYSL3	MDFIC	0.753517	0
LRRC32	MDFIC	0.734787	0
CMTM3	MDFIC	0.703201	0
ELN	MDFIC	0.603003	0
GGT5	MDFIC	0.751681	0
TGFB1I1	MDFIC	0.694123	0
AXL	MDFIC	0.759332	0
RFTN1	MDFIC	0.839517	0
TIMP2	MDFIC	0.695023	0
SYT11	MDFIC	0.749495	0
FSTL1	MDFIC	0.774453	0
IGFBP7	MDFIC	0.719047	0
PDGFRB	MDFIC	0.720035	0
LUM	MDFIC	0.735967	0
BGN	MDFIC	0.640704	0
LBH	MDFIC	0.702122	0
FBXL7	MDFIC	0.791767	0
C1S	MDFIC	0.75644	0
MXRA8	MDFIC	0.605452	0
SERPING1	SYDE1	0.760395	0
DPYSL3	SYDE1	0.795488	0
LRRC32	SYDE1	0.886843	0
CMTM3	SYDE1	0.807599	0
ELN	SYDE1	0.759364	0
GGT5	SYDE1	0.905471	0
TGFB1I1	SYDE1	0.886716	0
AXL	SYDE1	0.821304	0
RFTN1	SYDE1	0.850582	0
TIMP2	SYDE1	0.827283	0
SYT11	SYDE1	0.769324	0
FSTL1	SYDE1	0.896972	0
IGFBP7	SYDE1	0.858662	0
PDGFRB	SYDE1	0.884434	0
LUM	SYDE1	0.838893	0
BGN	SYDE1	0.846368	0
LBH	SYDE1	0.749151	0
FBXL7	SYDE1	0.894173	0
C1S	SYDE1	0.821048	0
MXRA8	SYDE1	0.817634	0
DPYSL3	SERPING1	0.74279	0
LRRC32	SERPING1	0.74395	0
CMTM3	SERPING1	0.809965	0
ELN	SERPING1	0.621122	0
GGT5	SERPING1	0.807095	0
TGFB1I1	SERPING1	0.728249	0
AXL	SERPING1	0.802846	0
RFTN1	SERPING1	0.807793	0
TIMP2	SERPING1	0.716957	0
SYT11	SERPING1	0.716802	0
FSTL1	SERPING1	0.752288	0
IGFBP7	SERPING1	0.768782	0
PDGFRB	SERPING1	0.711978	0
LUM	SERPING1	0.765676	0
BGN	SERPING1	0.725448	0
LBH	SERPING1	0.706857	0
FBXL7	SERPING1	0.733487	0
C1S	SERPING1	0.908177	0
MXRA8	SERPING1	0.763298	0
LRRC32	DPYSL3	0.766299	0
CMTM3	DPYSL3	0.732311	0
ELN	DPYSL3	0.710821	0
GGT5	DPYSL3	0.764161	0
TGFB1I1	DPYSL3	0.870129	0
AXL	DPYSL3	0.755764	0
RFTN1	DPYSL3	0.729479	0
TIMP2	DPYSL3	0.748501	0
SYT11	DPYSL3	0.800553	0
FSTL1	DPYSL3	0.8109	0
IGFBP7	DPYSL3	0.781254	0
PDGFRB	DPYSL3	0.700331	0
LUM	DPYSL3	0.775284	0
BGN	DPYSL3	0.718448	0
LBH	DPYSL3	0.703064	0
FBXL7	DPYSL3	0.83076	0
C1S	DPYSL3	0.749388	0
MXRA8	DPYSL3	0.780865	0
CMTM3	LRRC32	0.794884	0
ELN	LRRC32	0.755719	0
GGT5	LRRC32	0.893717	0
TGFB1I1	LRRC32	0.755217	0
AXL	LRRC32	0.791214	0
RFTN1	LRRC32	0.855842	0
TIMP2	LRRC32	0.783445	0
SYT11	LRRC32	0.707022	0
FSTL1	LRRC32	0.866501	0
IGFBP7	LRRC32	0.80307	0
PDGFRB	LRRC32	0.931032	0
LUM	LRRC32	0.819394	0
BGN	LRRC32	0.848051	0
LBH	LRRC32	0.723388	0
FBXL7	LRRC32	0.847956	0
C1S	LRRC32	0.785617	0
MXRA8	LRRC32	0.761981	0
ELN	CMTM3	0.659095	0
GGT5	CMTM3	0.767542	0
TGFB1I1	CMTM3	0.752376	0
AXL	CMTM3	0.798484	0
RFTN1	CMTM3	0.777673	0
TIMP2	CMTM3	0.714588	0
SYT11	CMTM3	0.675718	0
FSTL1	CMTM3	0.790421	0
IGFBP7	CMTM3	0.787173	0
PDGFRB	CMTM3	0.770603	0
LUM	CMTM3	0.759153	0
BGN	CMTM3	0.800873	0
LBH	CMTM3	0.713445	0
FBXL7	CMTM3	0.729049	0
C1S	CMTM3	0.772698	0
MXRA8	CMTM3	0.80426	0
GGT5	ELN	0.733146	0
TGFB1I1	ELN	0.741019	0
AXL	ELN	0.645315	0
RFTN1	ELN	0.710793	0
TIMP2	ELN	0.703681	0
SYT11	ELN	0.686508	0
FSTL1	ELN	0.743477	0
IGFBP7	ELN	0.730287	0
PDGFRB	ELN	0.683119	0
LUM	ELN	0.71826	0
BGN	ELN	0.650954	0
LBH	ELN	0.725898	0
FBXL7	ELN	0.733245	0
C1S	ELN	0.689266	0
MXRA8	ELN	0.755453	0
TGFB1I1	GGT5	0.808153	0
AXL	GGT5	0.785413	0
RFTN1	GGT5	0.883157	0
TIMP2	GGT5	0.784352	0
SYT11	GGT5	0.725983	0
FSTL1	GGT5	0.826671	0
IGFBP7	GGT5	0.840559	0
PDGFRB	GGT5	0.866149	0
LUM	GGT5	0.831982	0
BGN	GGT5	0.838517	0
LBH	GGT5	0.731685	0
FBXL7	GGT5	0.842664	0
C1S	GGT5	0.844084	0
MXRA8	GGT5	0.776804	0
AXL	TGFB1I1	0.790336	0
RFTN1	TGFB1I1	0.737477	0
TIMP2	TGFB1I1	0.790141	0
SYT11	TGFB1I1	0.791232	0
FSTL1	TGFB1I1	0.816197	0
IGFBP7	TGFB1I1	0.837301	0
PDGFRB	TGFB1I1	0.717799	0
LUM	TGFB1I1	0.795145	0
BGN	TGFB1I1	0.753531	0
LBH	TGFB1I1	0.702516	0
FBXL7	TGFB1I1	0.826246	0
C1S	TGFB1I1	0.770337	0
MXRA8	TGFB1I1	0.789154	0
RFTN1	AXL	0.797169	0
TIMP2	AXL	0.761204	0
SYT11	AXL	0.749063	0
FSTL1	AXL	0.821306	0
IGFBP7	AXL	0.753248	0
PDGFRB	AXL	0.788929	0
LUM	AXL	0.7679	0
BGN	AXL	0.743664	0
LBH	AXL	0.711283	0
FBXL7	AXL	0.7821	0
C1S	AXL	0.806078	0
MXRA8	AXL	0.720125	0
TIMP2	RFTN1	0.733636	0
SYT11	RFTN1	0.764086	0
FSTL1	RFTN1	0.810655	0
IGFBP7	RFTN1	0.823961	0
PDGFRB	RFTN1	0.824519	0
LUM	RFTN1	0.755888	0
BGN	RFTN1	0.714736	0
LBH	RFTN1	0.767467	0
FBXL7	RFTN1	0.836734	0
C1S	RFTN1	0.855316	0
MXRA8	RFTN1	0.689835	0
SYT11	TIMP2	0.682284	0
FSTL1	TIMP2	0.837031	0
IGFBP7	TIMP2	0.693216	0
PDGFRB	TIMP2	0.799945	0
LUM	TIMP2	0.840162	0
BGN	TIMP2	0.780957	0
LBH	TIMP2	0.704306	0
FBXL7	TIMP2	0.804172	0
C1S	TIMP2	0.753446	0
MXRA8	TIMP2	0.753843	0
FSTL1	SYT11	0.754156	0
IGFBP7	SYT11	0.72966	0
PDGFRB	SYT11	0.673832	0
LUM	SYT11	0.672549	0
BGN	SYT11	0.588906	0
LBH	SYT11	0.706111	0
FBXL7	SYT11	0.801891	0
C1S	SYT11	0.773421	0
MXRA8	SYT11	0.650064	0
IGFBP7	FSTL1	0.812799	0
PDGFRB	FSTL1	0.890812	0
LUM	FSTL1	0.902317	0
BGN	FSTL1	0.840548	0
LBH	FSTL1	0.751907	0
FBXL7	FSTL1	0.887589	0
C1S	FSTL1	0.806358	0
MXRA8	FSTL1	0.807217	0
PDGFRB	IGFBP7	0.738388	0
LUM	IGFBP7	0.760632	0
BGN	IGFBP7	0.782263	0
LBH	IGFBP7	0.739133	0
FBXL7	IGFBP7	0.795824	0
C1S	IGFBP7	0.75515	0
MXRA8	IGFBP7	0.736186	0
LUM	PDGFRB	0.847789	0
BGN	PDGFRB	0.875259	0
LBH	PDGFRB	0.707098	0
FBXL7	PDGFRB	0.857178	0
C1S	PDGFRB	0.759581	0
MXRA8	PDGFRB	0.742878	0
BGN	LUM	0.848395	0
LBH	LUM	0.706285	0
FBXL7	LUM	0.813301	0
C1S	LUM	0.798413	0
MXRA8	LUM	0.786883	0
LBH	BGN	0.703057	0
FBXL7	BGN	0.743989	0
C1S	BGN	0.703992	0
MXRA8	BGN	0.789832	0
FBXL7	LBH	0.715018	0
C1S	LBH	0.712259	0
MXRA8	LBH	0.710667	0
C1S	FBXL7	0.79004	0
MXRA8	FBXL7	0.764469	0
MXRA8	C1S	0.747327	0
